# Supplementary material for: Comparison of HLA allelic imputation programs
Source: PubMed Central journal article supplement (PMC5312875; doi:10.1371/journal.pone.0172444), 2017-02-16
Supplement: pone.0172444.s001.pdf [file pone.0172444.s001.pdf]

## **SUPPLEMENTAL MATERIALS**

### **Comparison of HLA Allelic Imputation Programs**

Jason H Karnes<sup>1,2</sup>, Christian M Shaffer<sup>2</sup>, Lisa Bastarache<sup>3</sup>, Silvana Gaudieri<sup>4,5,6</sup>, Andrew M Glazer<sup>2</sup>, Heidi E Steiner<sup>1</sup>, Jonathan D Mosley<sup>2</sup>, Simon Mallal<sup>7</sup>, Joshua C Denny<sup>3</sup>, Elizabeth J Phillips<sup>2,4,6</sup>, Dan M Roden<sup>2,3,8\*</sup>

- 1) Department of Pharmacy Practice and Science, University of Arizona College of Pharmacy, Tucson, AZ
- 2) Division of Clinical Pharmacology, Department of Medicine, Vanderbilt University Medical Center, Nashville, TN
- 3) Department of Biomedical Informatics, Vanderbilt University School of Medicine, Nashville, TN
- 4) Division of Infectious Diseases, Department of Medicine, Vanderbilt University Medical Center, Nashville, TN
- 5) School of Anatomy, Physiology and Human Biology, University of Western Australia, Nedlands, Western Australia, Australia
- 6) Institute for Immunology & Infectious Diseases, Murdoch University, Murdoch, Western Australia, Australia
- 7) Department of Pathology, Microbiology and Immunology, Vanderbilt University School of Medicine, Nashville, TN
- 8) Department of Pharmacology, Vanderbilt University School of Medicine, Nashville, TN

**\*Corresponding Author:**

Email: [dan.roden@vanderbilt.edu](mailto:dan.roden@vanderbilt.edu)

**Table S1:** HLA imputation programs evaluation for all HLA alleles and posterior probability ratio greater than 1.5

| Race/Ethnicity                            | Imputation Program | Concordance Rate | Call Rate | Predicted Alleles (n) |
|-------------------------------------------|--------------------|------------------|-----------|-----------------------|
| European Americans (n=2,947) <sup>1</sup> | SNP2HLA            | 0.976            | 0.995     | 210                   |
|                                           | HLA*IMP:02         | 0.945            | 0.970     | 140                   |
|                                           | HIBAG              | 0.981            | 0.954     | 175                   |
| African Americans (n=318) <sup>2</sup>    | SNP2HLA            | 0.912            | 1.00      | 174                   |
|                                           | HLA*IMP:02         | 0.681            | 0.887     | 134                   |
|                                           | HIBAG              | 0.954            | 0.471     | 131                   |

Concordance and call rates generated from imputed alleles versus sequenced alleles after combining data for HumanOmni1-QUAD and HumanOmni5-QUAD platforms by race/ethnicity. HLA allele calls are restricted to posterior probability > 0.5 and posterior probability ratio > 1.5. Posterior probability ratio was calculated as the ratio of highest and second highest posterior probability for an individual sample.

- 1) Based on sequencing, 325 distinct four digit alleles were present in the European American population.
- 2) Based on sequencing, 219 distinct four digit alleles were present in the African American population.

**Table S2:** Concordance rate and call rate for each imputation program by HLA locus and posterior probability ratio greater than 1.5

| Allele          | Imputation Program | European Americans |           | African Americans |           |
|-----------------|--------------------|--------------------|-----------|-------------------|-----------|
|                 |                    | Concordance Rate   | Call Rate | Concordance Rate  | Call Rate |
| <i>HLA-A</i>    | SNP2HLA            | 0.984              | 0.997     | 0.978             | 0.991     |
|                 | HLA*IMP:02         | 0.964              | 0.991     | 0.547             | 0.862     |
|                 | HIBAG              | 0.986              | 0.989     | 0.970             | 0.726     |
| <i>HLA-B</i>    | SNP2HLA            | 0.973              | 0.989     | 0.886             | 0.989     |
|                 | HLA*IMP:02         | 0.955              | 0.966     | 0.547             | 0.862     |
|                 | HIBAG              | 0.982              | 0.943     | 0.969             | 0.305     |
| <i>HLA-C</i>    | SNP2HLA            | 0.987              | 0.998     | 0.842             | 1.00      |
|                 | HLA*IMP:02         | 0.984              | 0.994     | 0.807             | 0.931     |
|                 | HIBAG              | 0.988              | 0.987     | 0.979             | 0.516     |
| <i>HLA-DPB1</i> | SNP2HLA            | 0.961              | 0.989     | 0.944             | 1.00      |
|                 | HLA*IMP:02         | 0.844              | 0.942     | 0.607             | 0.772     |
|                 | HIBAG              | 0.962              | 0.951     | 0.867             | 0.343     |
| <i>HLA-DQB1</i> | SNP2HLA            | 0.989              | 0.999     | 0.907             | 0.995     |
|                 | HLA*IMP:02         | 0.984              | 0.992     | 0.866             | 0.918     |
|                 | HIBAG              | 0.991              | 0.977     | 0.947             | 0.472     |
| <i>HLA-DRB1</i> | SNP2HLA            | 0.959              | 0.997     | 0.919             | 0.994     |
|                 | HLA*IMP:02         | 0.932              | 0.936     | 0.515             | 0.892     |
|                 | HIBAG              | 0.972              | 0.875     | 0.966             | 0.462     |

Concordance and call rates generated from imputed alleles versus sequenced alleles

after combining data for HumanOmni1-QUAD and HumanOmni5-QUAD platforms by

HLA locus and race/ethnicity. HLA allele calls are restricted to posterior probability >

0.5 and posterior probability ratio>1.5. Posterior probability ratio was calculated as the

ratio of highest and second highest posterior probability for an individual sample.

**Table S3:** Frequencies and concordance rates for HLA alleles by imputation program and race/ethnicity<sup>1,2</sup>

| HLA allele | European Americans |         |       |         | African Americans |         |       |         |
|------------|--------------------|---------|-------|---------|-------------------|---------|-------|---------|
|            | FREQ               | SNP2HLA | HIBAG | HLA*IMP | FREQ              | SNP2HLA | HIBAG | HLA*IMP |
| A*01:01    | 0.156              | 0.998   | 0.998 | 0.998   | 0.039             | 0.960   | 0.750 | 0.800   |
| A*01:02    | 0.000              | NA      | NA    | NA      | 0.008             | 0.800   | NA    | NA      |
| A*01:03    | 0.000              | 1.000   | NA    | NA      | 0.000             | NA      | NA    | NA      |
| A*02:01    | 0.286              | 0.993   | 0.990 | 0.983   | 0.095             | 0.983   | 0.980 | 0.983   |
| A*02:02    | 0.001              | 0.750   | 1.000 | NA      | 0.047             | 0.967   | 1.000 | NA      |
| A*02:03    | 0.001              | 0.000   | NA    | NA      | 0.000             | NA      | NA    | NA      |
| A*02:05    | 0.008              | 1.000   | 1.000 | 1.000   | 0.013             | 1.000   | 0.800 | 0.250   |
| A*02:06    | 0.003              | 0.850   | 0.929 | 0.000   | 0.000             | NA      | NA    | NA      |
| A*02:07    | 0.000              | 0.000   | NA    | NA      | 0.000             | NA      | NA    | NA      |
| A*02:11    | 0.000              | 0.000   | NA    | NA      | 0.000             | NA      | NA    | NA      |
| A*03:01    | 0.144              | 0.995   | 0.979 | 0.978   | 0.095             | 0.983   | 1.000 | 0.902   |
| A*03:02    | 0.002              | 0.929   | NA    | NA      | 0.000             | NA      | NA    | NA      |
| A*11:01    | 0.065              | 0.995   | 0.992 | 0.995   | 0.025             | 0.938   | 1.000 | 0.929   |
| A*23:01    | 0.018              | 1.000   | 1.000 | 0.991   | 0.115             | 1.000   | 1.000 | 1.000   |
| A*24:02    | 0.079              | 0.985   | 0.985 | 0.976   | 0.011             | 1.000   | 1.000 | 0.368   |
| A*24:03    | 0.000              | NA      | NA    | 0.000   | 0.000             | NA      | NA    | NA      |
| A*24:07    | 0.000              | 0.000   | NA    | NA      | 0.000             | NA      | NA    | NA      |
| A*24:10    | 0.001              | 0.000   | NA    | NA      | 0.000             | NA      | NA    | NA      |
| A*25:01    | 0.021              | 0.857   | 0.882 | 0.758   | 0.003             | 0.500   | NA    | 0.167   |
| A*26:01    | 0.022              | 0.858   | 0.895 | 0.851   | 0.013             | 0.875   | 0.429 | 0.545   |
| A*29:01    | 0.003              | 1.000   | 1.000 | NA      | 0.000             | NA      | NA    | NA      |
| A*29:02    | 0.041              | 0.996   | 1.000 | 0.937   | 0.036             | 1.000   | 1.000 | 0.955   |
| A*30:01    | 0.013              | 1.000   | 1.000 | 0.988   | 0.081             | 1.000   | 1.000 | 0.980   |
| A*30:02    | 0.011              | 1.000   | 1.000 | 1.000   | 0.068             | 1.000   | 1.000 | 1.000   |
| A*30:04    | 0.001              | 1.000   | 1.000 | 1.000   | 0.000             | NA      | NA    | 1.000   |
| A*31:01    | 0.033              | 0.984   | 0.995 | 0.990   | 0.019             | 0.667   | 1.000 | 0.389   |
| A*32:01    | 0.032              | 0.995   | 0.995 | 0.974   | 0.009             | 1.000   | 1.000 | 0.159   |
| A*33:00    | 0.000              | NA      | NA    | 0.000   | 0.000             | NA      | NA    | 0.000   |
| A*33:01    | 0.007              | 0.854   | 0.854 | NA      | 0.019             | 1.000   | 1.000 | NA      |
| A*33:03    | 0.003              | 0.933   | 1.000 | NA      | 0.066             | 1.000   | 1.000 | NA      |
| A*34:02    | 0.001              | 1.000   | 1.000 | 0.571   | 0.032             | 1.000   | 1.000 | 1.000   |
| A*36:01    | 0.000              | NA      | NA    | NA      | 0.016             | 1.000   | 0.769 | NA      |
| A*43:86    | 0.000              | NA      | NA    | 0.000   | 0.000             | NA      | NA    | NA      |
| A*66:01    | 0.003              | 1.000   | 1.000 | NA      | 0.011             | 1.000   | NA    | NA      |
| A*66:02    | 0.000              | NA      | NA    | NA      | 0.000             | NA      | 1.000 | NA      |
| A*68:01    | 0.037              | 0.991   | 0.995 | 0.973   | 0.044             | 1.000   | 1.000 | 0.596   |

**Table S3 (continued)**

| Allele         | European Americans |         |       |         | African Americans |         |       |         |
|----------------|--------------------|---------|-------|---------|-------------------|---------|-------|---------|
|                | FREQ               | SNP2HLA | HIBAG | HLA*IMP | FREQ              | SNP2HLA | HIBAG | HLA*IMP |
| <b>A*68:02</b> | 0.010              | 0.983   | 1.000 | 0.891   | 0.062             | 1.000   | 1.000 | 0.972   |
| <b>A*68:03</b> | 0.000              | 0.000   | NA    | NA      | 0.000             | NA      | NA    | NA      |
| <b>A*69:01</b> | 0.001              | 1.000   | 1.000 | NA      | 0.000             | NA      | NA    | NA      |
| <b>A*74:01</b> | 0.001              | 0.200   | NA    | NA      | 0.070             | 0.886   | 0.943 | NA      |
| <b>A*74:03</b> | 0.000              | NA      | 1.000 | NA      | 0.000             | NA      | NA    | NA      |
| <b>A*80:01</b> | 0.000              | NA      | NA    | NA      | 0.000             | 1.000   | 1.000 | NA      |
| <b>B*07:02</b> | 0.140              | 0.993   | 0.994 | 0.989   | 0.077             | 0.939   | 0.897 | 0.882   |
| <b>B*07:05</b> | 0.002              | 0.846   | 0.917 | 0.818   | 0.022             | 0.643   | NA    | 0.273   |
| <b>B*08:01</b> | 0.116              | 0.994   | 0.993 | 0.994   | 0.047             | 0.967   | 1.000 | 0.885   |
| <b>B*13:01</b> | 0.000              | NA      | NA    | NA      | 0.002             | 0.000   | NA    | NA      |
| <b>B*13:02</b> | 0.025              | 1.000   | 0.993 | 0.966   | 0.008             | 1.000   | NA    | 0.444   |
| <b>B*14:01</b> | 0.011              | 0.984   | 1.000 | 0.984   | 0.006             | 1.000   | NA    | 0.500   |
| <b>B*14:02</b> | 0.025              | 1.000   | 1.000 | 0.979   | 0.019             | 1.000   | 1.000 | 1.000   |
| <b>B*15:01</b> | 0.062              | 0.970   | 0.964 | 0.926   | 0.013             | 0.750   | NA    | 0.217   |
| <b>B*15:03</b> | 0.003              | 1.000   | 1.000 | 0.833   | 0.064             | 1.000   | 1.000 | 1.000   |
| <b>B*15:10</b> | 0.001              | 1.000   | 1.000 | NA      | 0.025             | 0.938   | 1.000 | 0.500   |
| <b>B*15:16</b> | 0.001              | 1.000   | 1.000 | 0.500   | 0.019             | 1.000   | 1.000 | 0.667   |
| <b>B*15:17</b> | 0.003              | 0.941   | 0.938 | 0.577   | 0.006             | 1.000   | NA    | 0.800   |
| <b>B*15:18</b> | 0.003              | 0.938   | 0.929 | 0.933   | 0.002             | 1.000   | NA    | 1.000   |
| <b>B*15:25</b> | 0.000              | 0.000   | NA    | NA      | 0.005             | 0.000   | NA    | NA      |
| <b>B*18:01</b> | 0.041              | 0.946   | 0.953 | 0.943   | 0.027             | 0.941   | 1.000 | 0.786   |
| <b>B*18:03</b> | 0.000              | NA      | NA    | 0.000   | 0.000             | NA      | NA    | 0.000   |
| <b>B*27:02</b> | 0.002              | 0.600   | 1.000 | NA      | 0.000             | NA      | NA    | 0.000   |
| <b>B*27:05</b> | 0.039              | 0.948   | 0.965 | 0.940   | 0.009             | 0.667   | NA    | 0.333   |
| <b>B*27:07</b> | 0.000              | 0.500   | NA    | NA      | 0.000             | NA      | NA    | NA      |
| <b>B*35:01</b> | 0.054              | 0.966   | 0.974 | 0.894   | 0.069             | 0.886   | 0.944 | 0.366   |
| <b>B*35:02</b> | 0.007              | 0.854   | 0.878 | 0.917   | 0.000             | NA      | NA    | NA      |
| <b>B*35:03</b> | 0.013              | 0.924   | 0.955 | 0.877   | 0.003             | 0.500   | NA    | 0.200   |
| <b>B*35:08</b> | 0.003              | 0.667   | 0.864 | NA      | 0.000             | NA      | NA    | 0.000   |
| <b>B*35:12</b> | 0.000              | 0.000   | NA    | NA      | 0.000             | NA      | NA    | NA      |
| <b>B*35:17</b> | 0.000              | NA      | NA    | NA      | 0.000             | NA      | NA    | 0.000   |
| <b>B*37:01</b> | 0.013              | 1.000   | 1.000 | 0.949   | 0.006             | 1.000   | NA    | 0.750   |
| <b>B*38:01</b> | 0.012              | 0.944   | 0.983 | 0.900   | 0.000             | NA      | NA    | 0.000   |
| <b>B*38:02</b> | 0.001              | 0.500   | NA    | NA      | 0.000             | NA      | NA    | NA      |
| <b>B*39:01</b> | 0.010              | 0.842   | 0.836 | 0.788   | 0.011             | 0.286   | NA    | 0.167   |
| <b>B*39:06</b> | 0.005              | 0.903   | 0.950 | 0.727   | 0.002             | 1.000   | 1.000 | 0.000   |

**Table S3 (continued)**

| Allele         | European Americans |         |       |         | African Americans |         |       |         |
|----------------|--------------------|---------|-------|---------|-------------------|---------|-------|---------|
|                | FREQ               | SNP2HLA | HIBAG | HLA*IMP | FREQ              | SNP2HLA | HIBAG | HLA*IMP |
| <b>B*39:09</b> | 0.000              | NA      | NA    | NA      | 0.002             | 0.000   | NA    | NA      |
| <b>B*39:10</b> | 0.000              | 0.000   | NA    | 0.000   | 0.006             | 1.000   | 1.000 | NA      |
| <b>B*39:24</b> | 0.000              | NA      | 1.000 | 0.000   | 0.000             | NA      | NA    | 0.000   |
| <b>B*40:01</b> | 0.067              | 1.000   | 0.997 | 0.992   | 0.009             | 1.000   | NA    | 1.000   |
| <b>B*40:02</b> | 0.013              | 0.935   | 0.947 | 0.910   | 0.002             | 1.000   | NA    | 1.000   |
| <b>B*40:06</b> | 0.001              | 0.167   | 1.000 | NA      | 0.000             | NA      | NA    | NA      |
| <b>B*41:01</b> | 0.002              | 1.000   | 1.000 | 0.632   | 0.008             | 0.400   | NA    | 0.061   |
| <b>B*41:02</b> | 0.003              | 0.895   | 0.895 | 0.895   | 0.000             | NA      | NA    | 0.250   |
| <b>B*42:01</b> | 0.001              | 1.000   | NA    | NA      | 0.038             | 1.000   | 1.000 | NA      |
| <b>B*42:02</b> | 0.000              | NA      | NA    | NA      | 0.017             | 0.455   | 1.000 | NA      |
| <b>B*44:02</b> | 0.098              | 0.993   | 0.993 | 0.990   | 0.016             | 0.700   | NA    | 0.467   |
| <b>B*44:03</b> | 0.050              | 0.966   | 0.960 | 0.949   | 0.067             | 0.953   | 0.846 | 0.642   |
| <b>B*44:04</b> | 0.001              | 0.333   | NA    | 0.000   | 0.002             | 0.000   | NA    | NA      |
| <b>B*44:05</b> | 0.002              | 0.857   | 0.857 | 0.923   | 0.000             | NA      | NA    | 0.000   |
| <b>B*45:01</b> | 0.008              | 0.960   | 0.979 | 0.955   | 0.036             | 0.957   | 1.000 | 0.900   |
| <b>B*46:01</b> | 0.000              | NA      | NA    | NA      | 0.002             | 0.000   | NA    | NA      |
| <b>B*47:01</b> | 0.002              | 1.000   | 1.000 | 1.000   | 0.002             | 1.000   | NA    | 1.000   |
| <b>B*48:01</b> | 0.000              | 0.500   | NA    | NA      | 0.000             | NA      | NA    | NA      |
| <b>B*49:01</b> | 0.015              | 0.989   | 0.977 | 0.977   | 0.041             | 0.962   | 1.000 | 0.727   |
| <b>B*50:01</b> | 0.010              | 0.915   | 0.946 | 0.898   | 0.003             | 0.500   | NA    | 0.333   |
| <b>B*51:01</b> | 0.048              | 0.950   | 0.957 | 0.941   | 0.038             | 0.458   | 0.500 | 0.357   |
| <b>B*51:05</b> | 0.000              | NA      | NA    | NA      | 0.003             | 0.000   | NA    | NA      |
| <b>B*51:08</b> | 0.001              | 0.250   | 1.000 | NA      | 0.002             | 0.000   | NA    | 0.000   |
| <b>B*52:01</b> | 0.007              | 0.952   | 1.000 | 0.976   | 0.005             | 0.333   | 0.500 | NA      |
| <b>B*53:01</b> | 0.005              | 1.000   | 1.000 | 1.000   | 0.118             | 1.000   | 0.976 | 0.971   |
| <b>B*54:01</b> | 0.000              | 1.000   | NA    | NA      | 0.000             | NA      | NA    | NA      |
| <b>B*55:01</b> | 0.019              | 0.945   | 0.971 | 0.951   | 0.005             | 0.667   | NA    | 1.000   |
| <b>B*56:01</b> | 0.007              | 0.881   | 0.947 | 0.761   | 0.003             | 1.000   | NA    | 1.000   |
| <b>B*56:03</b> | 0.000              | NA      | NA    | NA      | 0.002             | 0.000   | NA    | NA      |
| <b>B*56:04</b> | 0.000              | NA      | NA    | NA      | 0.002             | 0.000   | NA    | NA      |
| <b>B*57:01</b> | 0.040              | 0.996   | 0.991 | 0.978   | 0.003             | 1.000   | NA    | 0.118   |
| <b>B*57:02</b> | 0.000              | NA      | NA    | NA      | 0.002             | 1.000   | NA    | NA      |
| <b>B*57:03</b> | 0.001              | 0.571   | NA    | NA      | 0.038             | 1.000   | 0.917 | 1.000   |
| <b>B*58:01</b> | 0.005              | 1.000   | 1.000 | 1.000   | 0.033             | 0.857   | 1.000 | 0.621   |
| <b>B*58:02</b> | 0.001              | 1.000   | NA    | NA      | 0.047             | 0.967   | 0.957 | NA      |
| <b>B*73:01</b> | 0.000              | 1.000   | 1.000 | NA      | 0.000             | NA      | NA    | NA      |

**Table S3 (continued)**

| European Americans |       |         |       |         | African Americans |         |       |         |
|--------------------|-------|---------|-------|---------|-------------------|---------|-------|---------|
| Allele             | FREQ  | SNP2HLA | HIBAG | HLA*IMP | FREQ              | SNP2HLA | HIBAG | HLA*IMP |
| <b>B*78:01</b>     | 0.000 | NA      | NA    | NA      | 0.002             | 0.000   | NA    | NA      |
| <b>B*81:01</b>     | 0.000 | NA      | NA    | NA      | 0.011             | 1.000   | NA    | NA      |
| <b>C*01:02</b>     | 0.037 | 0.982   | 0.986 | 0.982   | 0.009             | 0.833   | NA    | 0.714   |
| <b>C*02:02</b>     | 0.040 | 0.962   | 0.970 | 0.954   | 0.082             | 0.127   | 0.385 | 0.125   |
| <b>C*02:06</b>     | 0.000 | NA      | NA    | NA      | 0.001             | 0.000   | NA    | NA      |
| <b>C*02:10</b>     | 0.000 | NA      | 1.000 | NA      | 0.000             | NA      | 1.000 | NA      |
| <b>C*03:02</b>     | 0.001 | 0.875   | 0.833 | NA      | 0.019             | 0.923   | 1.000 | NA      |
| <b>C*03:03</b>     | 0.058 | 0.994   | 0.969 | 0.985   | 0.021             | 0.929   | NA    | 0.471   |
| <b>C*03:04</b>     | 0.089 | 0.987   | 0.986 | 0.970   | 0.049             | 0.970   | 0.933 | 0.500   |
| <b>C*03:05</b>     | 0.000 | NA      | NA    | NA      | 0.001             | 0.000   | NA    | NA      |
| <b>C*03:06</b>     | 0.000 | 0.000   | NA    | NA      | 0.001             | 0.000   | NA    | NA      |
| <b>C*04:01</b>     | 0.095 | 0.989   | 0.991 | 0.991   | 0.198             | 0.955   | 0.962 | 0.953   |
| <b>C*04:03</b>     | 0.000 | 0.000   | NA    | NA      | 0.001             | 0.000   | NA    | NA      |
| <b>C*04:04</b>     | 0.000 | 0.000   | NA    | NA      | 0.001             | 0.000   | NA    | NA      |
| <b>C*04:07</b>     | 0.000 | 0.000   | NA    | NA      | 0.001             | 0.000   | NA    | NA      |
| <b>C*04:09</b>     | 0.000 | NA      | NA    | NA      | 0.000             | NA      | NA    | 0.000   |
| <b>C*04:10</b>     | 0.000 | 0.000   | NA    | NA      | 0.001             | 0.000   | NA    | NA      |
| <b>C*05:01</b>     | 0.099 | 0.976   | 0.978 | 0.971   | 0.024             | 0.938   | 1.000 | 0.600   |
| <b>C*06:02</b>     | 0.097 | 0.991   | 0.991 | 0.991   | 0.088             | 0.949   | 1.000 | 0.966   |
| <b>C*07:01</b>     | 0.153 | 0.990   | 0.991 | 0.991   | 0.129             | 0.977   | 0.966 | 0.973   |
| <b>C*07:02</b>     | 0.149 | 0.998   | 0.999 | 0.999   | 0.063             | 0.976   | 1.000 | 0.953   |
| <b>C*07:04</b>     | 0.015 | 0.989   | 1.000 | 1.000   | 0.007             | 0.800   | 1.000 | 1.000   |
| <b>C*07:26</b>     | 0.000 | 0.000   | NA    | NA      | 0.003             | 0.000   | NA    | NA      |
| <b>C*08:01</b>     | 0.001 | 0.333   | NA    | NA      | 0.006             | 0.000   | NA    | NA      |
| <b>C*08:02</b>     | 0.035 | 0.980   | 0.985 | 0.966   | 0.039             | 0.808   | 1.000 | 0.808   |
| <b>C*08:04</b>     | 0.000 | NA      | NA    | NA      | 0.000             | NA      | 1.000 | NA      |
| <b>C*12:02</b>     | 0.007 | 0.976   | 1.000 | 1.000   | 0.001             | 0.000   | NA    | NA      |
| <b>C*12:03</b>     | 0.036 | 0.991   | 1.000 | 1.000   | 0.016             | 0.909   | 1.000 | 0.846   |
| <b>C*12:04</b>     | 0.000 | 0.000   | NA    | NA      | 0.001             | 0.000   | NA    | NA      |
| <b>C*14:02</b>     | 0.012 | 0.973   | 1.000 | 0.985   | 0.027             | 0.667   | 0.889 | 0.375   |
| <b>C*14:03</b>     | 0.000 | NA      | 1.000 | NA      | 0.000             | NA      | NA    | NA      |
| <b>C*15:02</b>     | 0.021 | 0.960   | 0.967 | 0.952   | 0.004             | 0.667   | NA    | 0.286   |
| <b>C*15:04</b>     | 0.000 | 0.000   | NA    | NA      | 0.003             | 0.000   | NA    | NA      |
| <b>C*15:05</b>     | 0.003 | 0.867   | 1.000 | 1.000   | 0.027             | 0.944   | 1.000 | 1.000   |
| <b>C*16:01</b>     | 0.038 | 0.969   | 0.973 | 0.940   | 0.072             | 0.979   | 1.000 | 1.000   |
| <b>C*16:02</b>     | 0.003 | 0.947   | 1.000 | 1.000   | 0.001             | 0.000   | NA    | NA      |

**Table S3 (continued)**

| Allele            | European Americans |         |       |         | African Americans |         |       |         |
|-------------------|--------------------|---------|-------|---------|-------------------|---------|-------|---------|
|                   | FREQ               | SNP2HLA | HIBAG | HLA*IMP | FREQ              | SNP2HLA | HIBAG | HLA*IMP |
| <b>C*16:04</b>    | 0.001              | 0.571   | 1.000 | NA      | 0.003             | 0.000   | NA    | NA      |
| <b>C*17:01</b>    | 0.006              | 0.972   | 1.000 | 1.000   | 0.058             | 0.949   | 1.000 | 0.974   |
| <b>C*18:01</b>    | 0.000              | 0.667   | NA    | NA      | 0.034             | 0.913   | 0.923 | NA      |
| <b>DPB1*01:01</b> | 0.058              | 0.991   | 0.991 | 0.601   | 0.295             | 1.000   | 0.986 | 0.880   |
| <b>DPB1*02:01</b> | 0.127              | 0.940   | 0.954 | 0.903   | 0.118             | 1.000   | 0.950 | 0.540   |
| <b>DPB1*02:02</b> | 0.007              | 0.886   | 1.000 | 0.000   | 0.000             | NA      | NA    | NA      |
| <b>DPB1*03:01</b> | 0.112              | 0.879   | 1.000 | 0.756   | 0.062             | 0.950   | 1.000 | 0.882   |
| <b>DPB1*04:01</b> | 0.424              | 0.981   | 0.961 | 0.960   | 0.127             | 0.902   | 1.000 | 0.822   |
| <b>DPB1*04:02</b> | 0.113              | 0.982   | 0.986 | 0.944   | 0.115             | 0.932   | NA    | 0.882   |
| <b>DPB1*05:01</b> | 0.022              | 0.992   | 1.000 | 0.520   | 0.003             | 1.000   | NA    | 0.167   |
| <b>DPB1*05:02</b> | 0.000              | NA      | NA    | 0.000   | 0.000             | NA      | NA    | 0.000   |
| <b>DPB1*06:01</b> | 0.019              | 0.737   | 0.827 | NA      | 0.003             | 1.000   | NA    | NA      |
| <b>DPB1*06:02</b> | 0.000              | NA      | NA    | 0.000   | 0.000             | NA      | 0.000 | NA      |
| <b>DPB1*09:01</b> | 0.005              | 0.806   | 0.793 | 0.018   | 0.001             | 1.000   | NA    | 0.000   |
| <b>DPB1*10:01</b> | 0.021              | 0.960   | 1.000 | 0.089   | 0.006             | 0.500   | NA    | 0.000   |
| <b>DPB1*10:40</b> | 0.000              | NA      | 0.000 | NA      | 0.000             | NA      | 0.000 | NA      |
| <b>DPB1*11:01</b> | 0.024              | 0.993   | 0.992 | 0.858   | 0.031             | 0.800   | 1.000 | 0.684   |
| <b>DPB1*13:01</b> | 0.020              | 1.000   | 1.000 | 0.812   | 0.051             | 0.697   | 1.000 | 0.600   |
| <b>DPB1*14:01</b> | 0.011              | 0.954   | 0.919 | NA      | 0.005             | 1.000   | NA    | NA      |
| <b>DPB1*15:01</b> | 0.007              | 1.000   | 1.000 | NA      | 0.002             | 1.000   | NA    | NA      |
| <b>DPB1*16:01</b> | 0.007              | 0.976   | 0.976 | NA      | 0.002             | 1.000   | NA    | NA      |
| <b>DPB1*17:01</b> | 0.014              | 0.938   | 1.000 | 0.237   | 0.067             | 0.837   | 1.000 | 1.000   |
| <b>DPB1*18:01</b> | 0.001              | 1.000   | NA    | NA      | 0.076             | 1.000   | 1.000 | NA      |
| <b>DPB1*19:01</b> | 0.007              | 1.000   | 0.976 | NA      | 0.003             | 1.000   | NA    | NA      |
| <b>DPB1*20:01</b> | 0.001              | 0.750   | 1.000 | NA      | 0.000             | NA      | NA    | NA      |
| <b>DPB1*23:01</b> | 0.001              | 0.333   | NA    | 0.000   | 0.000             | NA      | NA    | NA      |
| <b>DPB1*26:01</b> | 0.000              | 1.000   | NA    | NA      | 0.000             | NA      | NA    | NA      |
| <b>DPB1*28:01</b> | 0.000              | NA      | NA    | NA      | 0.002             | 1.000   | NA    | NA      |
| <b>DPB1*33:01</b> | 0.000              | NA      | NA    | NA      | 0.002             | 0.000   | NA    | NA      |
| <b>DPB1*40:01</b> | 0.000              | NA      | NA    | NA      | 0.019             | 0.917   | NA    | NA      |
| <b>DPB1*85:01</b> | 0.000              | NA      | NA    | NA      | 0.011             | 1.000   | NA    | NA      |
| <b>DQB1*02:01</b> | 0.127              | 0.980   | 0.997 | 0.997   | 0.134             | 0.518   | 0.727 | 0.953   |
| <b>DQB1*02:02</b> | 0.098              | 0.993   | 0.995 | 0.991   | 0.080             | 1.000   | 0.905 | 1.000   |
| <b>DQB1*03:01</b> | 0.188              | 0.980   | 0.982 | 0.972   | 0.160             | 0.971   | 1.000 | 0.758   |
| <b>DQB1*03:02</b> | 0.107              | 0.992   | 0.994 | 0.994   | 0.038             | 1.000   | 1.000 | 0.923   |
| <b>DQB1*03:03</b> | 0.049              | 0.990   | 1.000 | 0.997   | 0.016             | 1.000   | NA    | 1.000   |
| <b>DQB1*03:04</b> | 0.001              | 0.667   | 1.000 | NA      | 0.000             | NA      | NA    | NA      |



**Table S3 (continued):**

| Allele     | European Americans |         |       |         | African Americans |         |       |         |
|------------|--------------------|---------|-------|---------|-------------------|---------|-------|---------|
|            | FREQ               | SNP2HLA | HIBAG | HLA*IMP | FREQ              | SNP2HLA | HIBAG | HLA*IMP |
| DQB1*03:05 | 0.000              | 0.000   | NA    | NA      | 0.000             | NA      | NA    | NA      |
| DQB1*03:19 | 0.000              | NA      | 0.000 | NA      | 0.000             | NA      | 0.000 | NA      |
| DQB1*04:01 | 0.001              | 0.667   | NA    | NA      | 0.000             | NA      | NA    | NA      |
| DQB1*04:02 | 0.026              | 1.000   | 0.987 | 0.974   | 0.072             | 1.000   | 1.000 | 0.978   |
| DQB1*05:01 | 0.122              | 0.992   | 0.993 | 0.992   | 0.164             | 1.000   | 1.000 | 1.000   |
| DQB1*05:02 | 0.011              | 0.970   | 0.984 | 0.984   | 0.031             | 0.950   | 1.000 | 0.857   |
| DQB1*05:03 | 0.026              | 0.987   | 1.000 | 1.000   | 0.017             | 1.000   | NA    | 1.000   |
| DQB1*05:04 | 0.002              | 0.909   | 1.000 | NA      | 0.000             | NA      | NA    | NA      |
| DQB1*06:01 | 0.006              | 0.972   | 1.000 | 0.971   | 0.000             | NA      | NA    | 0.000   |
| DQB1*06:02 | 0.136              | 0.986   | 0.981 | 0.967   | 0.206             | 0.954   | 0.936 | 0.926   |
| DQB1*06:03 | 0.054              | 0.972   | 0.960 | 0.962   | 0.031             | 0.750   | 1.000 | 0.600   |
| DQB1*06:04 | 0.037              | 0.991   | 1.000 | 0.391   | 0.017             | 0.909   | 1.000 | 0.391   |
| DQB1*06:09 | 0.009              | 0.982   | 0.982 | 1.000   | 0.033             | 0.905   | 1.000 | 0.615   |
| DRB1*01:01 | 0.092              | 0.975   | 0.937 | 0.886   | 0.019             | 0.667   | 0.714 | 0.727   |
| DRB1*01:02 | 0.009              | 0.964   | 1.000 | 1.000   | 0.050             | 1.000   | 1.000 | 1.000   |
| DRB1*01:03 | 0.016              | 0.958   | 0.984 | 0.966   | 0.000             | NA      | NA    | 1.000   |
| DRB1*03:01 | 0.124              | 0.983   | 0.986 | 0.979   | 0.069             | 0.932   | 0.920 | 0.591   |
| DRB1*03:02 | 0.001              | 0.750   | 1.000 | NA      | 0.063             | 1.000   | 1.000 | NA      |
| DRB1*03:04 | 0.000              | 0.000   | NA    | NA      | 0.000             | NA      | NA    | NA      |
| DRB1*04:01 | 0.106              | 0.951   | 0.956 | 0.869   | 0.014             | 0.889   | NA    | 0.172   |
| DRB1*04:02 | 0.007              | 0.825   | 0.875 | 0.826   | 0.002             | 0.000   | NA    | NA      |
| DRB1*04:03 | 0.003              | 0.778   | 0.818 | 0.100   | 0.000             | NA      | 0.000 | NA      |
| DRB1*04:04 | 0.044              | 0.921   | 0.922 | 0.833   | 0.009             | 1.000   | NA    | 0.875   |
| DRB1*04:05 | 0.007              | 0.897   | 1.000 | 1.000   | 0.019             | 0.750   | NA    | 1.000   |
| DRB1*04:06 | 0.000              | 0.000   | 0.000 | NA      | 0.000             | NA      | NA    | NA      |
| DRB1*04:07 | 0.013              | 0.880   | 0.839 | 0.980   | 0.002             | 0.000   | NA    | NA      |
| DRB1*04:08 | 0.003              | 0.850   | 1.000 | NA      | 0.002             | 1.000   | NA    | NA      |
| DRB1*04:09 | 0.000              | 0.000   | NA    | NA      | 0.000             | NA      | NA    | NA      |
| DRB1*04:10 | 0.000              | 0.000   | NA    | NA      | 0.000             | NA      | NA    | NA      |
| DRB1*04:11 | 0.000              | 0.000   | NA    | NA      | 0.000             | NA      | NA    | NA      |
| DRB1*04:37 | 0.000              | 0.000   | NA    | NA      | 0.000             | NA      | NA    | NA      |
| DRB1*07:01 | 0.135              | 0.996   | 0.992 | 0.989   | 0.101             | 0.984   | 1.000 | 0.806   |
| DRB1*08:01 | 0.023              | 0.978   | 0.977 | 0.881   | 0.003             | 1.000   | NA    | 0.200   |
| DRB1*08:02 | 0.002              | 0.556   | NA    | NA      | 0.000             | NA      | NA    | NA      |
| DRB1*08:03 | 0.003              | 0.813   | 1.000 | 0.500   | 0.002             | 1.000   | NA    | 0.000   |
| DRB1*08:04 | 0.002              | 0.600   | 1.000 | 1.000   | 0.057             | 0.917   | 1.000 | 0.870   |

**Table S3 (continued):**

| Allele     | European Americans |         |       |         | African Americans |         |       |         |
|------------|--------------------|---------|-------|---------|-------------------|---------|-------|---------|
|            | FREQ               | SNP2HLA | HIBAG | HLA*IMP | FREQ              | SNP2HLA | HIBAG | HLA*IMP |
| DRB1*08:06 | 0.000              | 0.000   | NA    | NA      | 0.000             | NA      | NA    | NA      |
| DRB1*08:10 | 0.000              | NA      | 1.000 | NA      | 0.000             | NA      | NA    | NA      |
| DRB1*09:01 | 0.013              | 0.974   | 1.000 | 1.000   | 0.022             | 1.000   | 0.778 | 1.000   |
| DRB1*10:01 | 0.009              | 0.962   | 1.000 | 1.000   | 0.025             | 1.000   | 1.000 | 1.000   |
| DRB1*11:01 | 0.055              | 0.860   | 0.790 | 0.721   | 0.093             | 0.847   | 1.000 | 0.211   |
| DRB1*11:02 | 0.002              | 0.583   | 0.833 | NA      | 0.046             | 0.690   | 0.591 | 0.000   |
| DRB1*11:03 | 0.008              | 0.532   | 0.000 | 0.600   | 0.002             | 1.000   | NA    | 0.000   |
| DRB1*11:04 | 0.017              | 0.875   | 0.899 | 0.865   | 0.003             | 0.500   | 1.000 | 0.091   |
| DRB1*11:06 | 0.000              | 0.000   | NA    | NA      | 0.000             | NA      | NA    | NA      |
| DRB1*11:08 | 0.000              | 0.000   | NA    | NA      | 0.000             | NA      | NA    | NA      |
| DRB1*12:01 | 0.016              | 0.979   | 1.000 | 0.957   | 0.052             | 0.879   | 1.000 | 0.632   |
| DRB1*12:02 | 0.000              | 0.000   | NA    | NA      | 0.002             | 1.000   | NA    | NA      |
| DRB1*13:01 | 0.053              | 0.978   | 0.980 | 0.942   | 0.053             | 1.000   | 0.944 | 0.778   |
| DRB1*13:02 | 0.045              | 0.985   | 0.992 | 0.982   | 0.075             | 0.875   | 0.938 | 0.800   |
| DRB1*13:03 | 0.010              | 0.967   | 1.000 | 1.000   | 0.025             | 1.000   | 1.000 | 0.833   |
| DRB1*13:04 | 0.000              | 0.000   | NA    | NA      | 0.000             | NA      | NA    | NA      |
| DRB1*13:05 | 0.001              | 0.333   | NA    | NA      | 0.000             | NA      | NA    | NA      |
| DRB1*14:01 | 0.025              | 0.947   | 0.966 | 0.948   | 0.020             | 0.923   | NA    | 0.600   |
| DRB1*14:02 | 0.000              | 0.000   | NA    | NA      | 0.000             | NA      | NA    | NA      |
| DRB1*14:04 | 0.001              | 0.143   | 1.000 | NA      | 0.000             | NA      | NA    | 0.000   |
| DRB1*14:05 | 0.000              | 0.000   | NA    | NA      | 0.000             | NA      | NA    | NA      |
| DRB1*14:06 | 0.001              | 0.333   | NA    | NA      | 0.000             | NA      | NA    | NA      |
| DRB1*14:07 | 0.000              | 0.000   | NA    | NA      | 0.000             | NA      | NA    | NA      |
| DRB1*14:15 | 0.000              | 0.000   | NA    | NA      | 0.000             | NA      | NA    | NA      |
| DRB1*15:01 | 0.133              | 0.986   | 0.977 | 0.976   | 0.031             | 0.800   | 1.000 | 0.162   |
| DRB1*15:02 | 0.007              | 0.949   | 1.000 | 0.972   | 0.003             | 1.000   | NA    | 0.167   |
| DRB1*15:03 | 0.002              | 0.667   | NA    | NA      | 0.123             | 1.000   | 0.982 | NA      |
| DRB1*16:01 | 0.010              | 0.898   | 0.981 | 0.897   | 0.000             | NA      | NA    | 0.000   |
| DRB1*16:02 | 0.001              | 0.500   | 1.000 | NA      | 0.014             | 1.000   | 1.000 | NA      |

HLA indicates human leukocyte antigen; NA, not applicable.

- 1) NA indicates that the imputation program did not impute the allele
- 2) Concordance rates were generated using OMNI1 and OMNI5 combined SNP-level data and posterior probability>0.50 for each imputation program
